# Supplementary figures and images for: Diversity Begets Diversity When Diet Drives Snake Venom Evolution, but Evenness Rather Than Richness Is What Counts
Source: MDPI journal article supplement (doi:10.3390/toxins15040251), 2023-03-29

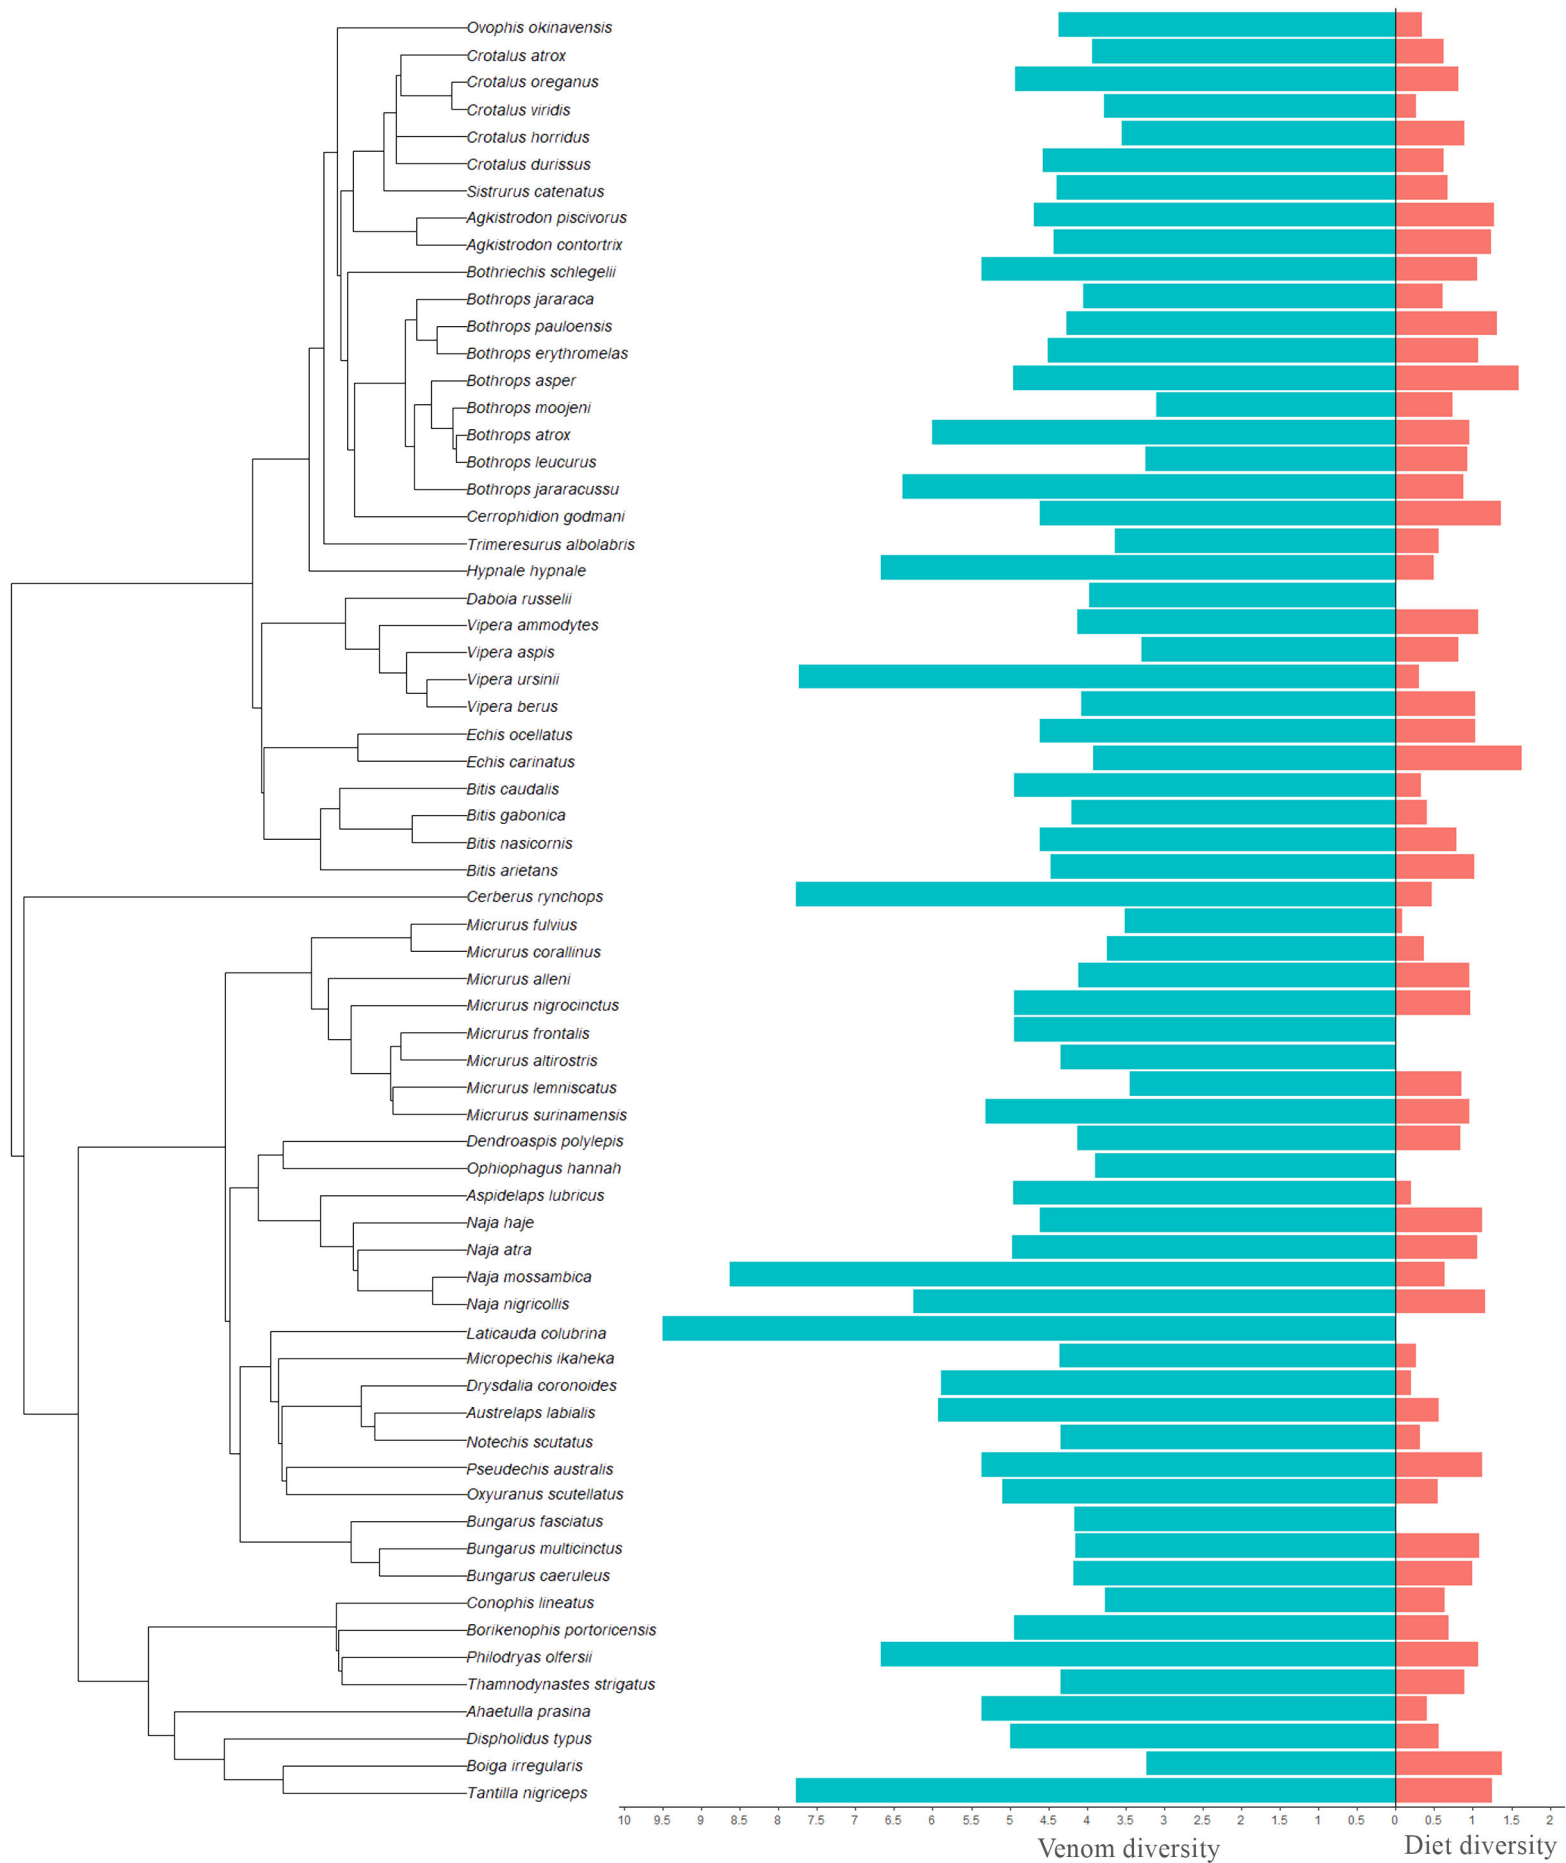

Supplement: s1 [file s1]
